# Supplementary material
Source: PubMed Central journal article supplement (PMC5541497)
Supplement: NIHMS868875-supplement-Tables_S1__S2.pdf [file NIHMS868875-supplement-Tables_S1__S2.pdf]

Table S1. List of primer and shRNA nucleotide sequences.

| Category            | Target                                | ID                            | Sequence (5'-3')                                               |
|---------------------|---------------------------------------|-------------------------------|----------------------------------------------------------------|
| Mutagenesis Primers | HIF-1 $\alpha$ (human)                | S31A-fwd<br>S31A-rev          | ATCTCGGCGAGCTAAAGAATCTGAAGTTTTTTATGAG<br>CTGGCTGCATCTCGAGAC    |
|                     |                                       | T63A-fwd<br>T63A-rev          | GATGAGGCTTGCCATCAGCTATTTG<br>ACAGAGGCCTTATCAAGATG              |
|                     |                                       | S692A-fwd<br>S692A-rev        | TAACGTGTTAGCTGTCGCTTTG<br>GGGCTTCTTGGATGAGATTTTTTC             |
|                     |                                       | T700A-fwd<br>T700A-rev        | GAGTCAAAGAGCTGCAGTTCTGAGG<br>AAAGCGACAGATAACACG                |
|                     |                                       | S727A-fwd<br>S727A-rev        | ACATGATGGTGCACCTTTTTCAAG<br>TCCATTTTTCGCTTTCTCTG               |
|                     |                                       | S760/761-fwd<br>S760/761A-rev | AGGATGCAAAGCTGCTGAACAGAATGGAATGGAG<br>TGGATCCCCGGAATTCC        |
|                     |                                       | S809A-fwd<br>S809A-rev        | TATACAAGGCGCCAGAAACCTACTGC<br>GGAGCATTAACCTCACAATC             |
| RT-qPCR Primers     | <i>HIF1A / Hif1a</i><br>(human / rat) | Fwd.<br>Rev.                  | CCACAGGACAGTACAGGATG<br>TCAAGTCGTGCTGAATAATACC                 |
|                     | CA9<br>(human)                        | Fwd.<br>Rev.                  | TCTCGTTTCCAATGCACGTACAGC<br>AGTGACAGCAGCAGTTGCACAGT            |
|                     | Ca9<br>(rat)                          | Fwd.<br>Rev.                  | CCTCTCTGCTGGTGACATCC<br>GTCCCATTCTGTGCCTGTG                    |
|                     | <i>PKD1 / Pdk1</i><br>(human / rat)   | Fwd.<br>Rev.                  | ACCAGGACAGCCAATACAAG<br>CCTCGGTCACCTCATCTTCC                   |
|                     | CD39 ( <i>ENTPD1</i> )<br>(human)     | Fwd.<br>Rev.                  | ACTATCGAGTCCCCAGATAATGC<br>CCTGATCCTTCCCATAGCACAA              |
|                     | CD39 ( <i>Entpd2</i> )<br>(rat)       | Fwd.<br>Rev.                  | TTCTGCTACTTTGCGTCCC<br>CCTGTGTCATTCTCCTTGTC                    |
|                     | CD73 ( <i>NT5E</i> )<br>(human)       | Fwd.<br>Rev.                  | CCAGTACCAGGGCACTATCTG<br>TGGCTCGATCAGTCCTTCCA                  |
|                     | CD73 ( <i>Nt5e</i> )<br>(rat)         | Fwd.<br>Rev.                  | ACCAACACCTTTCTCTACACAG<br>CTCAACCTTCAGATAGCCCAG                |
|                     | 18S RNA<br>(human / rat)              | Fwd.<br>Rev.                  | CGGCGACGACCCATTGGAAC<br>GAATCGAACCTGATTCCCCGTC                 |
| shRNA               | <i>PRKACA</i><br>(human)              | shCa-1                        | CCGGCAGCCCACTTGGATCAGTTTGCTCGAGCAAAC<br>TGATCCAAGTGGGCTGTTTTTG |
|                     |                                       | shCa-5                        | CCGGTAGATCTCACCAGCGCTTTGCTCGAGCAAAG<br>CGCTTGGTGAGATCTATTTTTG  |

Table S2. Antibodies used for immunoprecipitation (IP) and immunoblot (IB) assays.\*

| <u>Antibody target</u>    | <u>Commercial source</u> | <u>Catalog number</u> |
|---------------------------|--------------------------|-----------------------|
| CREB (IB)                 | Novus Biologicals        | NBP1-90364            |
| FIH-1 (IB)                | Novus Biologicals        | NB100-428             |
| GST (IB)                  | Santa Cruz Biotechnology | sc-459                |
| HIF-1 $\alpha$ (IB)       | BD Biosciences           | 610959                |
| HIF-1 $\alpha$ (IP)       | R&D Systems              | AF1935                |
| KAT3B/p300 (IP)           | Novus Biologicals        | NB100-616             |
| Penta-Histidine-HRP (IB)  | Qiagen                   | 1014992               |
| Phospho-Ser-133 CREB (IB) | Cell Signaling           | 9191                  |
| PKA-Ca (IB)               | Novus Biologicals        | NB100-92207           |
| PKA-R1a (IP)              | Novus Biologicals        | NBP1-47935            |
| Rat and human actin (IB)  | Santa Cruz Biotechnology | sc-1616               |
| Rat and human CD39 (IB)   | Santa Cruz Biotechnology | sc-33558              |
| Rat and human CD73 (IB)   | Novus Biologicals        | NBP1-85740            |
| Rat HIF-1 $\alpha$ (IB)   | Novus Biologicals        | NB100-479             |
| Rat PKA-R1a (IP)          | BD Biosciences           | 610166                |
| Yeast Gal4 DBD (IB)       | Santa Cruz Biotechnology | sc-577                |

---

\* Unless otherwise stated, all antibodies were raised against proteins of human origin.
